# Supplementary material for: Sustainable energy technologies for the Global South: challenges and solutions toward achieving SDG 7
Source: Royal Society of Chemistry journal article supplement (doi:10.1039/d2va00247g), 2023-01-01
Supplement: d2va00247g1.pdf [file d2va00247g1.pdf]

**Table S1.** Energy matrices of Global South regions and selected countries in 1990 and 2017

| Region                  | Year | Energy Matrix (Mtoe) |        |        |       |                  |       |         |        |       | Total   | Change (%) |
|-------------------------|------|----------------------|--------|--------|-------|------------------|-------|---------|--------|-------|---------|------------|
|                         |      | Fossil-based         |        |        |       | Non-fossil based |       |         |        |       |         |            |
|                         |      | Coal                 | Oil    | Gas    |       | Biomass          | Hydro | Nuclear | Others |       |         |            |
| World                   | 1990 | 2220.5               | 3232.7 | 1663.6 | 81.2% | 902.4            | 184.1 | 525.5   | 36.6   | 18.8% | 8765.4  | 59.4       |
|                         |      | 25.3%                | 36.9%  | 19%    |       | 10.3%            | 2.1%  | 6%      | 0.4%   |       |         |            |
|                         | 2017 | 3789.9               | 4449.5 | 3106.8 | 81.2% | 1329.1           | 351   | 687.5   | 256.8  | 18.8% | 13970.6 |            |
|                         |      | 27.1%                | 31.9%  | 22.2%  |       | 9.5%             | 2.5%  | 4.9%    | 1.9%   |       |         |            |
| Asia Pacific            | 1990 | 824.1                | 652.7  | 134.4  | 72.9% | 475.5            | 34.9  | 76.7    | 11.1   | 27.1% | 2209.3  | 163.3      |
|                         |      | 37.3%                | 29.5%  | 6.1%   |       | 21.5%            | 1.6%  | 3.5%    | 0.5%   |       |         |            |
|                         | 2017 | 2806                 | 1459.6 | 630.2  | 84.2% | 519.5            | 144.4 | 130.3   | 126    | 15.8% | 5816    |            |
|                         |      | 48.3%                | 25.1%  | 10.8%  |       | 8.9%             | 2.5%  | 2.2%    | 2.2%   |       |         |            |
| China                   | 1990 | 530.5                | 118.8  | 12.8   | 75.8% | 200.4            | 10.9  | -       | 0.033  | 24.2% | 873.5   | 250.8      |
|                         |      | 60.7%                | 13.6%  | 1.5%   |       | 22.9%            | 1.3%  |         |        |       |         |            |
|                         | 2017 | 1953.3               | 568.1  | 195.2  | 88.6% | 113.8            | 99.5  | 64.6    | 70.0   | 11.4% | 3064.6  |            |
|                         |      | 63.7%                | 18.5%  | 6.4%   |       | 3.7%             | 3.3%  | 2.1%    | 2.3%   |       |         |            |
| India                   | 1990 | 92.7                 | 61.1   | 10.6   | 53.8% | 133.5            | 6.2   | 1.6     | 0.01   | 46.2% | 305.6   | 188.6      |
|                         |      | 30.3%                | 20%    | 3.5%   |       | 43.7%            | 2.0%  | 0.5%    |        |       |         |            |
|                         | 2017 | 390.9                | 223.3  | 51     | 75.4% | 187.1            | 12.2  | 10      | 7.5    | 24.6% | 882.1   |            |
|                         |      | 44.3%                | 25.3%  | 5.8%   |       | 21.2%            | 1.4%  | 1.1%    | 0.9%   |       |         |            |
| Malaysia                | 1990 | 1.4                  | 11.5   | 6.8    | 92.5% | 1.2              | 0.3   | -       | -      | 7.5%  | 21.2    | 300.0      |
|                         |      | 6.4%                 | 54.1%  | 32%    |       | 5.9%             | 1.6%  |         |        |       |         |            |
|                         | 2017 | 20.7                 | 29     | 32.2   | 96.6% | 0.6              | 2.3   | -       | 0.028  | 3.4%  | 84.9    |            |
|                         |      | 24.4%                | 34.2%  | 38%    |       | 0.7%             | 2.7%  |         |        |       |         |            |
| Central & South America | 1990 | 17                   | 157.1  | 49.2   | 65.6% | 83               | 31.2  | 2.48    | 0.7    | 34.4% | 340.7   | 90.7       |
|                         |      | 5%                   | 46.1%  | 14.5%  |       | 24.4%            | 9.2%  | 0.7%    | 0.1%   |       |         |            |
|                         | 2017 | 32.3                 | 264.6  | 142.4  | 67.6% | 134.2            | 60.9  | 5.7     | 9.7    | 32.4% | 649.9   |            |
|                         |      | 5%                   | 40.7%  | 21.9%  |       | 20.6%            | 9.4%  | 0.9%    | 1.5%   |       |         |            |

|              |      |       |       |       |              |       |       |      |       |              |       |              |
|--------------|------|-------|-------|-------|--------------|-------|-------|------|-------|--------------|-------|--------------|
| Brazil       | 1990 | 9.7   | 58.9  | 3.3   | <b>52.1%</b> | 47.8  | 17.8  | 0.6  | -     | <b>47.9%</b> | 138   | <b>108</b>   |
|              |      | 7%    | 42.7% | 2.4%  |              | 34.6% | 12.9% | 0.4% |       |              |       |              |
|              | 2017 | 16.8  | 110.7 | 32.5  | <b>55.8%</b> | 86.5  | 31.9  | 4.1  | 4.5   | <b>44.2%</b> | 287   | <b>47.9</b>  |
|              |      | 5.9%  | 38.6% | 11.3% |              | 30.1% | 11.1% | 1.4% | 1.6%  |              |       |              |
| Mexico       | 1990 | 4.1   | 80.8  | 23.1  | <b>87.3%</b> | 8.6   | 2     | 0.8  | 4.4   | <b>12.7%</b> | 123.8 | <b>110.4</b> |
|              |      | 3.3%  | 65.3% | 18.7% |              | 6.9%  | 1.6%  | 0.6% | 3.6%  |              |       |              |
|              | 2017 | 12    | 82.2  | 68.7  | <b>89%</b>   | 9.3   | 2.8   | 3.6  | 4.4   | <b>11%</b>   | 183.1 | <b>47.8</b>  |
|              |      | 6.6%  | 44.9% | 37.5% |              | 5.1%  | 1.5%  | 2%   | 2.4%  |              |       |              |
| Africa       | 1990 | 74.2  | 85.2  | 29.5  | <b>49%</b>   | 189.4 | 4.8   | 2.2  | 0.3   | <b>51%</b>   | 385.6 | <b>137.9</b> |
|              |      | 19.2% | 22.1% | 7.7%  |              | 49.1% | 1.3%  | 0.6% |       |              |       |              |
|              | 2017 | 109.6 | 191.3 | 122.6 | <b>52.2%</b> | 367.5 | 10.5  | 3.7  | 6.1   | <b>47.8%</b> | 811.3 | <b>257.1</b> |
|              |      | 13.5% | 23.6% | 15.1% |              | 45.3% | 1.3%  | 0.5% | 0.7%  |              |       |              |
| South Africa | 1990 | 66.5  | 9.1   | 1.5   | <b>85.9%</b> | 10.4  | 0.1   | 2.2  | -     | <b>14.1%</b> | 89.8  | <b>47.8</b>  |
|              |      | 74.1% | 10.1% | 1.7%  |              | 11.6% | 0.1%  | 2.4% |       |              |       |              |
|              | 2017 | 98.2  | 18.8  | 4.3   | <b>91.3%</b> | 6.7   | 0.1   | 3.7  | 1     | <b>8.7%</b>  | 132.8 | <b>137.9</b> |
|              |      | 74%   | 14.1% | 3.2%  |              | 5.1%  | 0.1%  | 2.8% | 0.7%  |              |       |              |
| Ethiopia     | 1990 | -     | 0.8   | -     | <b>4.6%</b>  | 16.9  | 0.09  | -    | -     | <b>95.4%</b> | 17.8  | <b>137.9</b> |
|              |      |       | 4.6%  |       |              | 94.9% | 0.5%  |      |       |              |       |              |
|              | 2017 | 0.36  | 3.7   | -     | <b>9.5%</b>  | 37.2  | 1.1   | -    | -     | <b>90.5%</b> | 42.4  | <b>257.1</b> |
|              |      | 0.8%  | 8.7%  |       |              | 87.9% | 2.6%  |      |       |              |       |              |
| Middle East  | 1990 | -     | 137.3 | 71.6  | <b>99.5%</b> | -     | 1.03  | -    | 0.058 | <b>0.5%</b>  | 209.9 | <b>257.1</b> |
|              |      |       | 65.4% | 34.1% |              |       | 0.5%  |      |       |              |       |              |
|              | 2017 | 3.8   | 322.6 | 418.2 | <b>99.3%</b> | 0.92  | 1.52  | 1.96 | 0.56  | <b>0.7%</b>  | 749.6 | <b>257.1</b> |
|              |      | 0.5%  | 43%   | 55.8% |              | 0.1%  | 0.2%  | 0.3% | 0.1%  |              |       |              |
